# Supplementary material for: Metabolomics Analysis Identifies Differential Metabolites as Biomarkers for Acute Myocardial Infarction
Source: MDPI journal article supplement (doi:10.3390/biom14050532), 2024-04-29
Supplement: s1 [file s1]

**Figure S1** Correlation chord diagrams on differential metabolites.

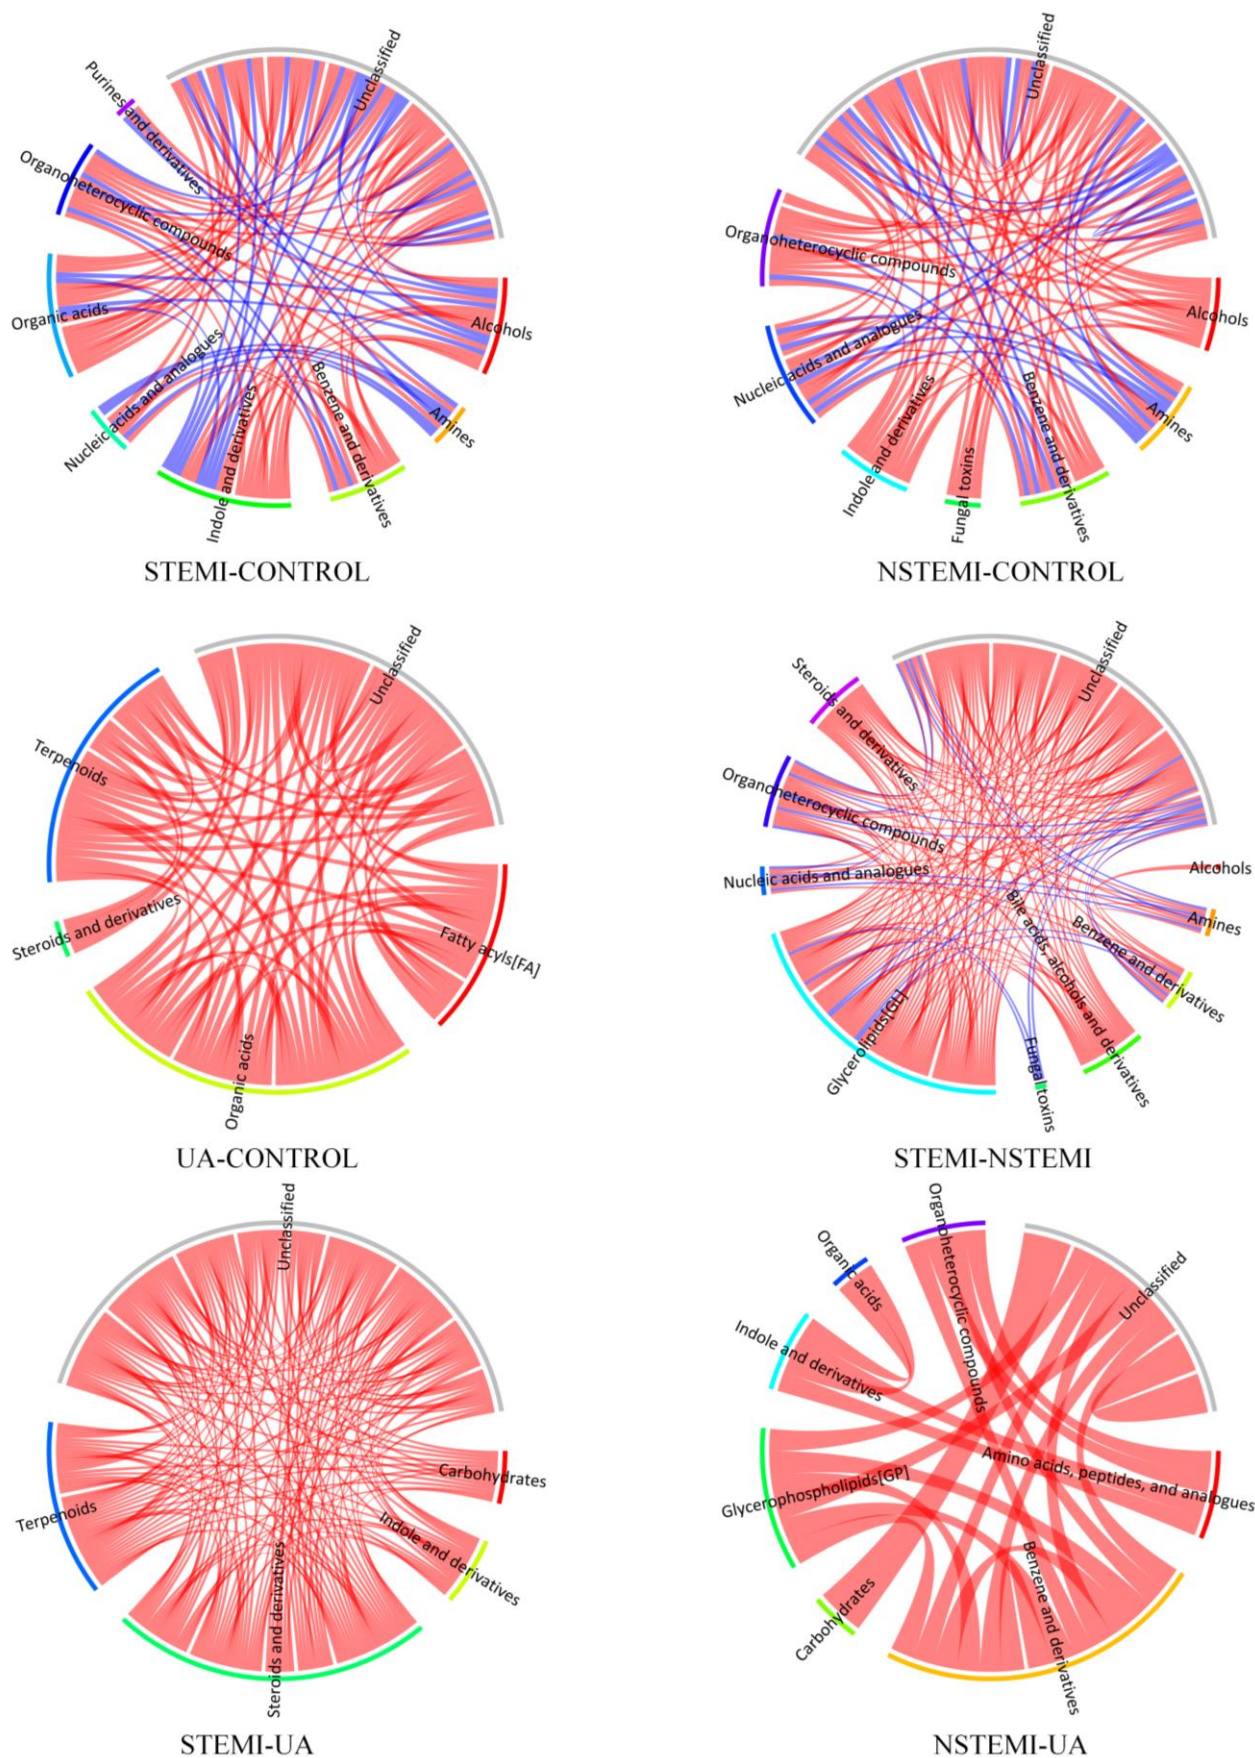

**Figure S2** Mass spectra of 14 differential metabolites.

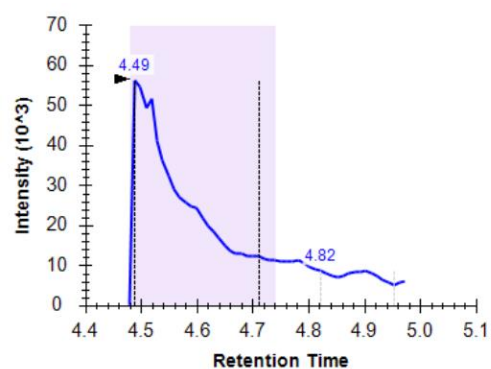

L-Aspartic acid

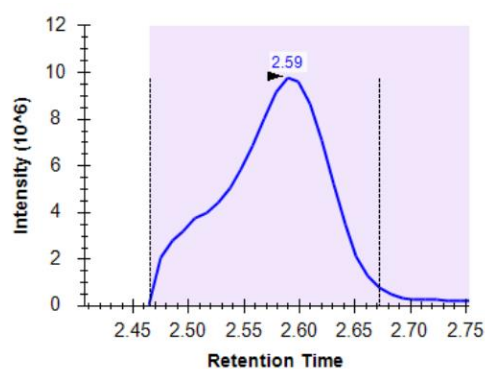

L-Acetylcarnitine

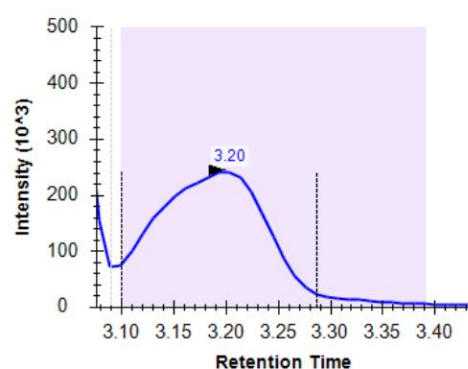

Acetylglycine

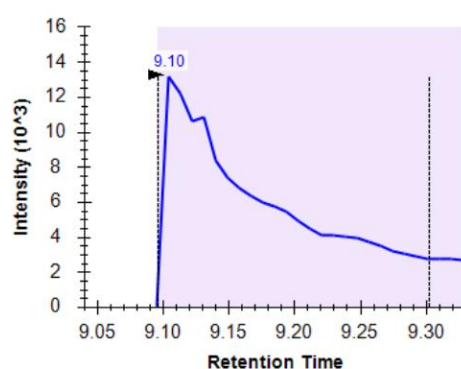

Decanoylcarnitine (C10)

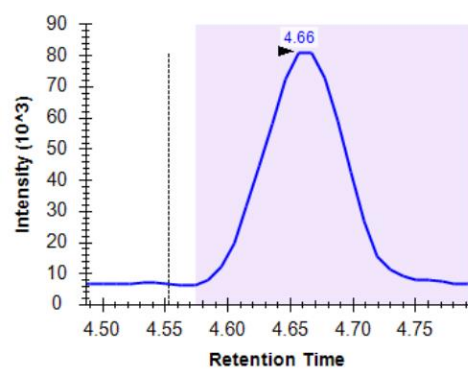

Hydroxyphenyllactic acid

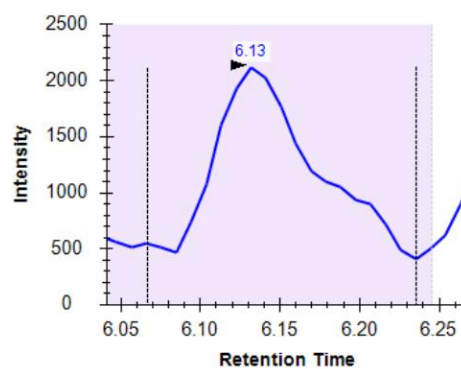

Ferulic acid

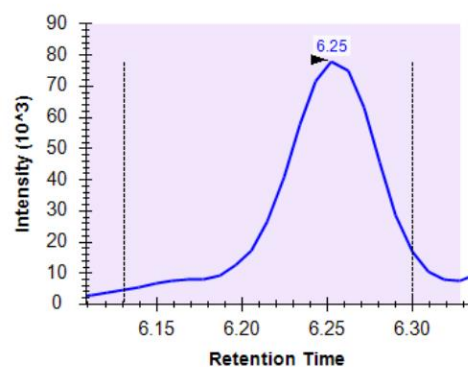

Itaconic acid

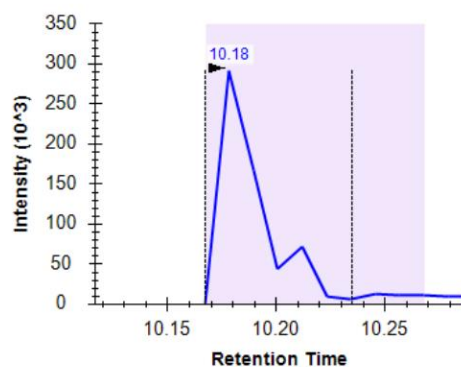

Lauroylcarnitine

Figure S2 Continued

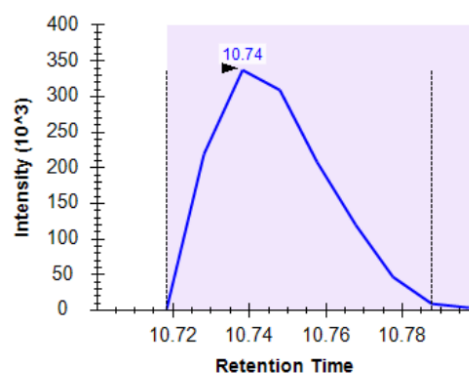

Myristoylcarnitine

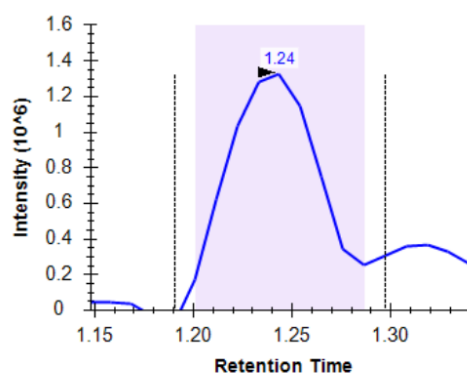

cis-4-Hydroxy-D-proline

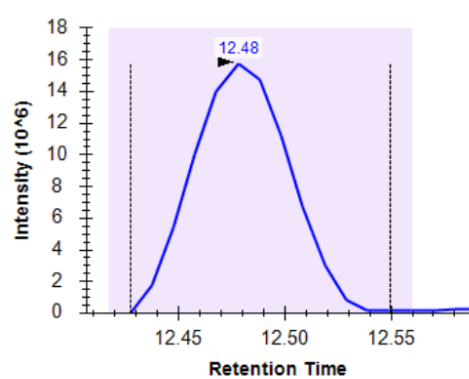

Arachidonic acid

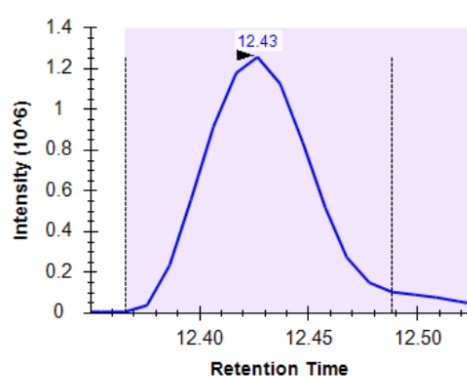

Palmitoleic acid

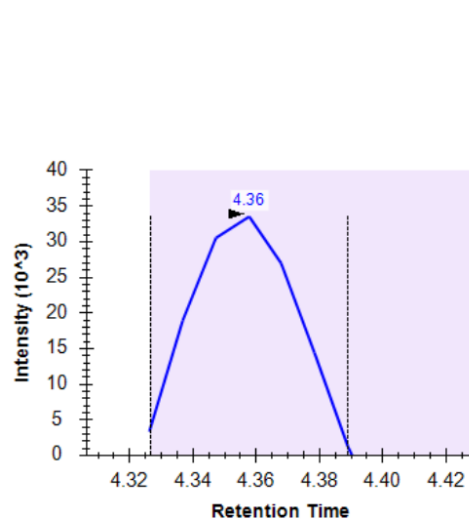

D-Aspartic acid

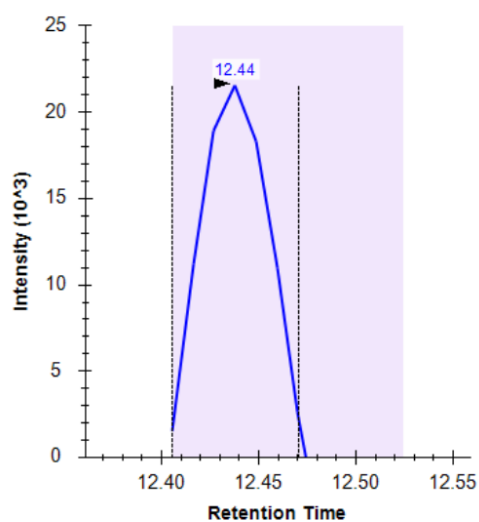

Palmitelaidic acid

**Table S1** Multiple hypothesis test of factors with significant differences.

|                           | group I | group J | p-adjusted |
|---------------------------|---------|---------|------------|
| <b>Cardiac Biomarkers</b> |         |         |            |
|                           | STEMI   | NSTEMI  | 0.579      |
| Myo                       | STEMI   | UA      | <0.001     |
|                           | NSTEMI  | UA      | 0.006      |
|                           | STEMI   | NSTEMI  | 1.000      |
| CKMB                      | STEMI   | UA      | 0.002      |
|                           | NSTEMI  | UA      | 0.005      |
|                           | STEMI   | NSTEMI  | 1.000      |
| TnI                       | STEMI   | UA      | 0.017      |
|                           | NSTEMI  | UA      | 0.002      |
| <b>Laboratory data</b>    |         |         |            |
| Blood glucose             | control | STEMI   | <0.001     |
|                           | control | NSTEMI  | <0.001     |
|                           | control | UA      | 0.014      |
|                           | STEMI   | NSTEMI  | 1.000      |
|                           | STEMI   | UA      | 0.972      |
|                           | NSTEMI  | UA      | 1.000      |
|                           | control | STEMI   | 0.017      |
| ALT                       | control | NSTEMI  | 1.000      |
|                           | control | UA      | 1.000      |
|                           | STEMI   | NSTEMI  | 0.004      |
|                           | STEMI   | UA      | 0.001      |
|                           | NSTEMI  | UA      | 1.000      |
|                           | control | STEMI   | <0.001     |
|                           | control | NSTEMI  | 0.017      |
| AST                       | control | UA      | 1.000      |
|                           | STEMI   | NSTEMI  | 0.06       |
|                           | STEMI   | UA      | <0.001     |
|                           | NSTEMI  | UA      | 0.014      |
|                           | control | STEMI   | <0.001     |
|                           | control | NSTEMI  | <0.001     |
|                           | control | UA      | 1.000      |
| ALT/AST                   | STEMI   | NSTEMI  | 0.681      |
|                           | STEMI   | UA      | <0.001     |
|                           | NSTEMI  | UA      | 0.035      |
|                           | control | STEMI   | 0.166      |
|                           | control | NSTEMI  | 0.175      |
|                           | control | UA      | 0.028      |
|                           | STEMI   | NSTEMI  | 1.000      |

|                       |         |        |        |
|-----------------------|---------|--------|--------|
| TG                    | STEMI   | UA     | 1.000  |
|                       | NSTEMI  | UA     | 1.000  |
|                       | control | STEMI  | 0.538  |
|                       | control | NSTEMI | 0.216  |
|                       | control | UA     | 0.030  |
|                       | STEMI   | NSTEMI | 1.000  |
|                       | STEMI   | UA     | 1.000  |
|                       | NSTEMI  | UA     | 1.000  |
|                       | control | STEMI  | 0.665  |
|                       | control | NSTEMI | 0.008  |
| HDL-C                 | control | UA     | 0.006  |
|                       | STEMI   | NSTEMI | 0.137  |
|                       | STEMI   | UA     | 0.084  |
|                       | NSTEMI  | UA     | 0.967  |
| <b>Length of stay</b> |         |        |        |
|                       | control | STEMI  | <0.001 |
|                       | control | NSTEMI | <0.001 |
|                       | control | UA     | 0.101  |
|                       | STEMI   | NSTEMI | 1.000  |
|                       | STEMI   | UA     | 0.032  |
|                       | NSTEMI  | UA     | 0.169  |

---

**Table S2** Summary of DMs pathways of discovery phase.

| Group        | TOP3 pathway                                       | DMs number | TOP1 DMs proportion pathway                                | TOP1 DMs number pathway                                                                |
|--------------|----------------------------------------------------|------------|------------------------------------------------------------|----------------------------------------------------------------------------------------|
| STEMI-CTRL   | Neuroactive ligand-receptor interaction (hsa04080) | 7          | Retrograde endocannabinoid signaling (hsa04723)            | Steroid hormone biosynthesis (hsa00140)                                                |
|              | Retrograde endocannabinoid signaling (hsa04723)    | 5          |                                                            |                                                                                        |
|              | Steroid hormone biosynthesis (hsa00140)            | 8          |                                                            |                                                                                        |
| NSTEMI-CTRL  | Biosynthesis of unsaturated fatty acids (hsa01040) | 8          | Retrograde endocannabinoid signaling (hsa04723)            | Biosynthesis of unsaturated fatty acids (hsa01040)                                     |
|              | Linoleic acid metabolism (hsa00591)                | 5          |                                                            |                                                                                        |
|              | Retrograde endocannabinoid signaling (hsa04723)    | 4          |                                                            |                                                                                        |
| UA-CTRL      | Biosynthesis of unsaturated fatty acids (hsa01040) | 13         | Fc gamma R-mediated phagocytosis (hsa04666)                | Biosynthesis of unsaturated fatty acids (hsa01040)                                     |
|              | Linoleic acid metabolism (hsa00591)                | 6          |                                                            |                                                                                        |
|              | Neuroactive ligand-receptor interaction (hsa04080) | 6          |                                                            |                                                                                        |
| STEMI-NSTEMI | Cholesterol metabolism (hsa04979)                  | 2          | Prion diseases (hsa05020)<br>Huntington disease (hsa05016) | Steroid hormone biosynthesis (hsa00140)                                                |
|              | Steroid hormone biosynthesis (hsa00140)            | 4          |                                                            |                                                                                        |
|              | Taurine and hypotaurine metabolism (hsa00430)      | 2          |                                                            |                                                                                        |
| STEMI-UA     | Protein digestion and absorption (hsa04974)        | 7          | FoxO signaling pathway (hsa04068)                          | Protein digestion and absorption (hsa04974)<br>Steroid hormone biosynthesis (hsa00140) |
|              | Steroid hormone biosynthesis (hsa00140)            | 7          |                                                            |                                                                                        |
|              | Aminoacyl-tRNA biosynthesis (hsa00970)             | 5          |                                                            |                                                                                        |
| NSTEMI-UA    | Protein digestion and absorption (hsa04974)        | 7          | Amyotrophic lateral sclerosis (ALS) (hsa05014)             | ABC transporters (hsa02010)                                                            |
|              | ABC transporters (hsa02010)                        | 8          |                                                            |                                                                                        |
|              | Aminoacyl-tRNA biosynthesis (hsa00970)             | 6          |                                                            |                                                                                        |

**Table S3** Summary of DMs pathways of validation phase.

| Group        | TOP3 pathway                                       | DMs number | TOP1 DMs proportion pathway      | TOP1 DMs number pathway                            |
|--------------|----------------------------------------------------|------------|----------------------------------|----------------------------------------------------|
| STEMI-CTRL   | Central carbon metabolism in cancer (hsa05230)     | 6          |                                  |                                                    |
|              | Biosynthesis of amino acids (hsa01230)             | 8          | Arginine biosynthesis (hsa00220) | Biosynthesis of amino acids (hsa01230)             |
|              | Arginine biosynthesis (hsa00220)                   | 5          |                                  |                                                    |
| NSTEMI-CTRL  | Biosynthesis of unsaturated fatty acids (hsa01040) | 6          |                                  | Biosynthesis of unsaturated fatty acids (hsa01040) |
|              | Biosynthesis of amino acids (hsa01230)             | 6          | Arginine biosynthesis (hsa00220) | Biosynthesis of amino acids (hsa01230)             |
|              | Arginine biosynthesis (hsa00220)                   | 4          |                                  |                                                    |
| STEMI-NSTEMI | Biosynthesis of unsaturated fatty acids (hsa01040) | 3          |                                  | Biosynthesis of unsaturated fatty acids (hsa01040) |
|              | ABC transporters (hsa02010)                        | 3          | Renal cell carcinoma (hsa05211)  | ABC transporters (hsa02010)                        |
|              | Central carbon metabolism in cancer (hsa05230)     | 2          |                                  |                                                    |

**Table S4** Regression analysis of DMs and CKMB.

|        |                          | CKMB  |              |
|--------|--------------------------|-------|--------------|
|        |                          | P     | Coefficients |
| STEMI  | L-Aspartic acid          | 0.002 | 1.893        |
|        | L-Acetylcarnitine        | 0.001 | 3.121        |
|        | Acetylglycine            | 1.000 | -            |
|        | Decanoylcarnitine        | 0.287 | -            |
|        | Hydroxyphenyllactic acid | 0.295 | -            |
|        | Ferulic acid             | 0.793 | -            |
|        | Itaconic acid            | 0.175 | -            |
|        | Lauroylcarnitine         | 0.082 | -            |
|        | Myristoylcarnitine       | 0.013 | 0.001        |
|        | cis-4-Hydroxy-D-proline  | 0.188 | -            |
|        | L-Aspartic acid          | 0.291 | -            |
| NSTEMI | Arachidonic acid         | 0.391 | -            |
|        | Palmitoleic acid         | 0.526 | -            |
|        | D-Aspartic acid          | 0.438 | -            |
|        | Palmitelaidic acid       | 0.494 | -            |



**Table S5** Regression analysis of DMs and disease severity.

|        |                          | P value<br>severity                                                                  |
|--------|--------------------------|--------------------------------------------------------------------------------------|
| STEMI  | L-Aspartic acid          | All the samples were multi-vessel diseases, and there was no difference in severity. |
|        | L-Acetylcarnitine        |                                                                                      |
|        | Acetylglycine            |                                                                                      |
|        | Decanoylcarnitine        |                                                                                      |
|        | Hydroxyphenyllactic acid |                                                                                      |
|        | Ferulic acid             |                                                                                      |
|        | Itaconic acid            |                                                                                      |
|        | Lauroylcarnitine         |                                                                                      |
|        | Myristoylcarnitine       |                                                                                      |
|        | cis-4-Hydroxy-D-proline  |                                                                                      |
| NSTEMI | L-Aspartic acid          | 0.397                                                                                |
|        | Arachidonic acid         | 0.893                                                                                |
|        | Palmitoleic acid         | 0.473                                                                                |
|        | D-Aspartic acid          | 0.266                                                                                |
|        | Palmitelaidic acid       | 0.391                                                                                |

**Table S6** Regression analysis of DMs and risk factors.

|        |                          | P value      |          |              |       |
|--------|--------------------------|--------------|----------|--------------|-------|
|        |                          | Hypertension | Diabetes | Dyslipidemia | Smoke |
| STEMI  | L-Aspartic acid          | 0.382        | 0.476    | 0.334        | 0.438 |
|        | L-Acetylcarnitine        | 0.432        | 0.840    | 0.598        | 0.504 |
|        | Acetylglycine            | 0.801        | 0.970    | 0.824        | 0.760 |
|        | Decanoylcarnitine        | 0.665        | 0.431    | 0.984        | 0.740 |
|        | Hydroxyphenyllactic acid | 0.002        | 0.002    | 0.002        | 0.007 |
|        | Ferulic acid             | 0.673        | 0.582    | 0.618        | 0.665 |
|        | Itaconic acid            | 0.198        | 0.597    | 0.558        | 0.648 |
|        | Lauroylcarnitine         | 0.468        | 0.552    | 0.773        | 0.965 |
|        | Myristoylcarnitine       | 0.373        | 0.848    | 0.570        | 0.909 |
|        | cis-4-Hydroxy-D-proline  | 0.271        | 0.273    | 0.095        | 0.115 |
| NSTEMI | L-Aspartic acid          | 0.485        | 0.472    | 0.716        | 0.791 |
|        | Arachidonic acid         | 0.792        | 0.675    | 0.603        | 0.723 |
|        | Palmitoleic acid         | 0.998        | 0.674    | 0.839        | 0.171 |
|        | D-Aspartic acid          | 0.509        | 0.476    | 0.886        | 0.931 |
|        | Palmitelaidic acid       | 0.844        | 0.601    | 0.666        | 0.196 |
